# Supplementary material
Source: PubMed Central journal article supplement (PMC5887140)
Supplement: 1421FileS3.pdf [file 1421FileS3.pdf]

**Mitotic and meiotic functions for the SUMOylation pathway in the *Caenorhabditis elegans* germline**

Reichman Rachel\*, Shi Zhuoyue\*, Malone Robert\* and Smolikove Sarit\*<sup>†</sup>

**Supplementary tables**

| Number of nuclei in PMT                    | N2      | <i>ubc-9</i> | <i>smo-1</i> | <i>ubc-9; mre-11(iow1)</i> | <i>mre-11(iow1)</i> | <i>ubc-9;spo-11</i> | <i>spo-11</i> |
|--------------------------------------------|---------|--------------|--------------|----------------------------|---------------------|---------------------|---------------|
| N2                                         | X       |              |              |                            |                     |                     |               |
| <i>ubc-9</i>                               | 0.0191  | X            |              |                            |                     |                     |               |
| <i>smo-1</i>                               | 0.0006  | 0.1049       | X            |                            |                     |                     |               |
| <i>ubc-9; mre-11(iow1)</i>                 | <0.0001 | 0.004        | 0.1376       | X                          |                     |                     |               |
| <i>mre-11(iow1)</i>                        | 0.123   | 0.4999       | 0.1375       | 0.0156                     | X                   |                     |               |
| <i>ubc-9;spo-11</i>                        | <0.0001 | 0.0142       | 0.3451       | 0.5352                     | 0.033               | X                   |               |
| <i>spo-11</i>                              | 0.0965  | <0.0001      | <0.0001      | <0.0001                    | 0.0026              | <0.0001             | X             |
| Number of nuclei in gonad before diplotene | N2      | <i>ubc-9</i> | <i>smo-1</i> | <i>ubc-9; mre-11(iow1)</i> | <i>mre-11(iow1)</i> | <i>ubc-9;spo-11</i> | <i>spo-11</i> |
| N2                                         | X       |              |              |                            |                     |                     |               |
| <i>ubc-9</i>                               | 0.0357  | X            |              |                            |                     |                     |               |
| <i>smo-1</i>                               | 0.1     | >0.9999      | X            |                            |                     |                     |               |
| <i>ubc-9; mre-11(iow1)</i>                 | 0.1     | 0.1429       | 0.4          | X                          |                     |                     |               |
| <i>mre-11(iow1)</i>                        | >0.9999 | 0.0357       | 0.1          | 0.1                        | X                   |                     |               |
| <i>ubc-9;spo-11</i>                        | 0.1     | 0.1607       | 0.7          | 0.1                        | 0.1                 | X                   |               |
| <i>spo-11</i>                              | 0.1     | 0.0357       | 0.1          | 0.1                        | 0.4                 | 0.1                 | X             |

**Table S1: Pairwise comparisons of number of nuclei in the PMT and number of nuclei in the gonad prior to diplotene.** The number of nuclei in the PMT and the number of nuclei in the germline from PMT through late pachytene were counted. Significance was determined through Mann-Whitney analysis. Significant p-values < 0.05 are in blue text, non-significant values are in red text.

| Gonad Length               | N2      | <i>ubc-9</i> | <i>smo-1</i> | <i>ubc-9;</i><br><i>mre-11(iow1)</i> | <i>mre-11(iow1)</i> | <i>ubc-9;spo-11</i> | <i>spo-11</i> |
|----------------------------|---------|--------------|--------------|--------------------------------------|---------------------|---------------------|---------------|
| N2                         | X       |              |              |                                      |                     |                     |               |
| <i>ubc-9</i>               | <0.0001 | X            |              |                                      |                     |                     |               |
| <i>smo-1</i>               | <0.0001 | 0.4716       | X            |                                      |                     |                     |               |
| <i>ubc-9; mre-11(iow1)</i> | <0.0001 | 0.0089       | <0.0001      | X                                    |                     |                     |               |
| <i>mre-11(iow1)</i>        | 0.123   | <0.0001      | <0.0001      | 0.0089                               | X                   |                     |               |
| <i>ubc-9;spo-11</i>        | <0.0001 | 0.0089       | 0.0048       | <0.0001                              | <0.0001             | X                   |               |
| <i>spo-11</i>              | 0.0005  | 0.0039       | <0.0001      | 0.9118                               | 0.0355              | <0.0001             | X             |
| Gonad Width (PMT)          | N2      | <i>ubc-9</i> | <i>smo-1</i> | <i>ubc-9;</i><br><i>mre-11(iow1)</i> | <i>mre-11(iow1)</i> | <i>ubc-9;spo-11</i> | <i>spo-11</i> |
| N2                         | X       |              |              |                                      |                     |                     |               |
| <i>ubc-9</i>               | 0.0021  | X            |              |                                      |                     |                     |               |
| <i>smo-1</i>               | 0.3119  | 0.0059       | X            |                                      |                     |                     |               |
| <i>ubc-9; mre-11(iow1)</i> | 0.0853  | 0.05         | 0.741        | X                                    |                     |                     |               |
| <i>mre-11(iow1)</i>        | 0.4359  | 0.0115       | 0.7088       | 0.6976                               | X                   |                     |               |
| <i>ubc-9;spo-11</i>        | 0.0065  | 0.0853       | 0.0372       | 0.2398                               | 0.0177              | X                   |               |
| <i>spo-11</i>              | 0.0784  | 0.0276       | 0.5992       | 0.795                                | 0.7034              | 0.0452              | X             |
| Gonad Width (MLP)          | N2      | <i>ubc-9</i> | <i>smo-1</i> | <i>ubc-9;</i><br><i>mre-11(iow1)</i> | <i>mre-11(iow1)</i> | <i>ubc-9;spo-11</i> | <i>spo-11</i> |
| N2                         | X       |              |              |                                      |                     |                     |               |
| <i>ubc-9</i>               | 0.0002  | X            |              |                                      |                     |                     |               |
| <i>smo-1</i>               | <0.0001 | 0.0001       | X            |                                      |                     |                     |               |
| <i>ubc-9; mre-11(iow1)</i> | 0.0024  | 0.2475       | <0.0001      | X                                    |                     |                     |               |
| <i>mre-11(iow1)</i>        | 0.0045  | 0.0066       | <0.0001      | 0.3054                               | X                   |                     |               |

|                     |         |        |         |        |        |        |   |
|---------------------|---------|--------|---------|--------|--------|--------|---|
| <i>abc-9;spo-11</i> | <0.0001 | 0.1903 | 0.0031  | 0.0021 | 0.0001 | X      |   |
| <i>spo-11</i>       | 0.001   | 0.219  | <0.0001 | 0.8585 | 0.2419 | 0.0133 | X |

**Table S2: Pairwise comparisons of gonad length and width measurements.** The length of the gonad from PMT to diplotene, width at the midpoint of the PMT, and width at mid-pachytene were measured. Significance of gonad measurements were determined through Mann-Whitney analysis. Significant p-values < 0.05 are in blue text, non-significant values are in red text.

| <b>PMT</b>                | N2      | <i>ubc-9</i> | <i>smo-1</i> | <i>ubc-9;mre-11(iow1)</i> | <i>mre-11(iow1)</i> | <i>ubc-9;spo-11</i> | <i>spo-11</i> | <i>mre-11(ok179)</i> |
|---------------------------|---------|--------------|--------------|---------------------------|---------------------|---------------------|---------------|----------------------|
| N2                        | X       |              |              |                           |                     |                     |               |                      |
| <i>ubc-9</i>              | <0.0001 | X            |              |                           |                     |                     |               |                      |
| <i>smo-1</i>              | <0.0001 | 0.0038       | X            |                           |                     |                     |               |                      |
| <i>ubc-9;mre-11(iow1)</i> | <0.0001 | 0.1083       | <0.0001      | X                         |                     |                     |               |                      |
| <i>mre-11(iow1)</i>       | <0.0001 | <0.0001      | <0.0001      | <0.0001                   | X                   |                     |               |                      |
| <i>ubc-9;spo-11</i>       | <0.0001 | 0.1083       | 0.2478       | 0.005                     | <0.0001             | X                   |               |                      |
| <i>spo-11</i>             | 0.7791  | <0.0001      | <0.0001      | <0.0001                   | <0.0001             | <0.0001             | X             |                      |
| <i>Mre-11(ok179)</i>      | <0.0001 | <0.0001      | <0.0001      | <0.0001                   | 0.5559              | <0.0001             | <0.0001       | X                    |
| <b>TZ</b>                 | N2      | <i>ubc-9</i> | <i>smo-1</i> | <i>ubc-9;mre-11(iow1)</i> | <i>mre-11(iow1)</i> | <i>ubc-9;spo-11</i> | <i>spo-11</i> | <i>mre-11(ok179)</i> |
| N2                        | X       |              |              |                           |                     |                     |               |                      |
| <i>ubc-9</i>              | <0.0001 | X            |              |                           |                     |                     |               |                      |
| <i>smo-1</i>              | <0.0001 | 0.5971       | X            |                           |                     |                     |               |                      |
| <i>ubc-9;mre-11(iow1)</i> | <0.0001 | 0.0071       | 0.062        | X                         |                     |                     |               |                      |
| <i>mre-11(iow1)</i>       | 0.4544  | <0.0001      | <0.0001      | <0.0001                   | X                   |                     |               |                      |
| <i>ubc-9;spo-11</i>       | <0.0001 | 0.0017       | 0.0235       | 0.465                     | <0.0001             | X                   |               |                      |
| <i>spo-11</i>             | <0.0001 | <0.0001      | <0.0001      | <0.0001                   | <0.0001             | <0.0001             | X             |                      |
| <i>Mre-11(ok179)</i>      | 0.404   | <0.0001      | <0.0001      | <0.0001                   | 0.9384              | <0.0001             | <0.0001       | X                    |
| <b>EP</b>                 | N2      | <i>ubc-9</i> | <i>smo-1</i> | <i>ubc-9;mre-11(iow1)</i> | <i>mre-11(iow1)</i> | <i>ubc-9;spo-11</i> | <i>spo-11</i> | <i>mre-11(ok179)</i> |

|                           |         |              |              |                           |                     |                     |               |                      |
|---------------------------|---------|--------------|--------------|---------------------------|---------------------|---------------------|---------------|----------------------|
| N2                        | X       |              |              |                           |                     |                     |               |                      |
| <i>ubc-9</i>              | <0.0001 | X            |              |                           |                     |                     |               |                      |
| <i>smo-1</i>              | <0.0001 | <0.0001      | X            |                           |                     |                     |               |                      |
| <i>ubc-9;mre-11(iow1)</i> | 0.102   | <0.0001      | <0.0001      | X                         |                     |                     |               |                      |
| <i>mre-11(iow1)</i>       | <0.0001 | <0.0001      | <0.0001      | <0.0001                   | X                   |                     |               |                      |
| <i>ubc-9;spo-11</i>       | 0.0003  | <0.0001      | <0.0001      | 0.0235                    | <0.0001             | X                   |               |                      |
| <i>spo-11</i>             | <0.0001 | <0.0001      | <0.0001      | <0.0001                   | 0.0008              | <0.0001             | X             |                      |
| <i>Mre-11(ok179)</i>      | <0.0001 | <0.0001      | <0.0001      | <0.0001                   | 0.0015              | 0.0004              | <0.0001       | X                    |
| <b>MLP</b>                | N2      | <i>ubc-9</i> | <i>smo-1</i> | <i>ubc-9;mre-11(iow1)</i> | <i>mre-11(iow1)</i> | <i>ubc-9;spo-11</i> | <i>spo-11</i> | <i>mre-11(ok179)</i> |
| N2                        | X       |              |              |                           |                     |                     |               |                      |
| <i>ubc-9</i>              | 0.3338  | X            |              |                           |                     |                     |               |                      |
| <i>smo-1</i>              | 0.2895  | 0.7853       | X            |                           |                     |                     |               |                      |
| <i>ubc-9;mre-11(iow1)</i> | <0.0001 | <0.0001      | <0.0001      | X                         |                     |                     |               |                      |
| <i>mre-11(iow1)</i>       | <0.0001 | <0.0001      | <0.0001      | <0.0001                   | X                   |                     |               |                      |
| <i>ubc-9;spo-11</i>       | <0.0001 | <0.0001      | <0.0001      | <0.0001                   | 0.3719              | X                   |               |                      |
| <i>spo-11</i>             | <0.0001 | <0.0001      | <0.0001      | <0.0001                   | <0.0001             | <0.0001             | X             |                      |
| <i>Mre-11(ok179)</i>      | <0.0001 | <0.0001      | <0.0001      | <0.0001                   | 0.0036              | 0.0006              | <0.0001       | X                    |

**Table S3: Pairwise significance for PMT, TZ, EP, and MLP RAD-51 focus counts (clustered).** Mann-Whitney analysis was performed on raw data for each pairwise comparison. n-values were at least 200 nuclei per genotype. Significant p-values are in blue text and non-significant p-values are in red text.

| PMT          | N2      | ubc-9   | smo-1   | ubc-9;iow1 | iow1    | ubc-9;spo-11 | spo-11  | ok179 |
|--------------|---------|---------|---------|------------|---------|--------------|---------|-------|
| N2           | X       |         |         |            |         |              |         |       |
| ubc-9        | <0.0001 | X       |         |            |         |              |         |       |
| smo-1        | <0.0001 | 0.0001  | X       |            |         |              |         |       |
| ubc-9;iow1   | <0.0001 | 0.391   | 0.0022  | X          |         |              |         |       |
| iow1         | <0.0001 | <0.0001 | <0.0001 | <0.0001    | X       |              |         |       |
| ubc-9;spo-11 | <0.0001 | 0.0236  | 0.1415  | 0.1333     | <0.0001 | X            |         |       |
| spo-11       | 0.7991  | <0.0001 | <0.0001 | <0.0001    | <0.0001 | <0.0001      | X       |       |
| ok179        | <0.0001 | <0.0001 | <0.0001 | <0.0001    | 0.8264  | <0.0001      | <0.0001 | X     |
| TZ           | N2      | ubc-9   | smo-1   | ubc-9;iow1 | iow1    | ubc-9;spo-11 | spo-11  | ok179 |
| N2           | X       |         |         |            |         |              |         |       |
| ubc-9        | <0.0001 | X       |         |            |         |              |         |       |
| smo-1        | <0.0001 | 0.064   | X       |            |         |              |         |       |
| ubc-9;iow1   | <0.0001 | 0.0005  | 0.1875  | X          |         |              |         |       |
| iow1         | 0.5765  | <0.0001 | <0.0001 | <0.0001    | X       |              |         |       |
| ubc-9;spo-11 | <0.0001 | 0.0016  | 0.183   | 0.8378     | <0.0001 | X            |         |       |
| spo-11       | <0.0001 | <0.0001 | <0.0001 | <0.0001    | <0.0001 | <0.0001      | X       |       |
| ok179        | 0.7759  | <0.0001 | <0.0001 | <0.0001    | 0.7979  | <0.0001      | <0.0001 | X     |
| EP           | N2      | ubc-9   | smo-1   | ubc-9;iow1 | iow1    | ubc-9;spo-11 | spo-11  | ok179 |
| N2           | X       |         |         |            |         |              |         |       |
| ubc-9        | <0.0001 | X       |         |            |         |              |         |       |
| smo-1        | <0.0001 | <0.0001 | X       |            |         |              |         |       |

|              |         |         |         |            |         |              |         |       |
|--------------|---------|---------|---------|------------|---------|--------------|---------|-------|
| ubc-9;iow1   | 0.1858  | <0.0001 | <0.0001 | X          |         |              |         |       |
| iow1         | <0.0001 | <0.0001 | <0.0001 | <0.0001    | X       |              |         |       |
| ubc-9;spo-11 | 0.0054  | <0.0001 | <0.0001 | 0.1178     | <0.0001 | X            |         |       |
| spo-11       | <0.0001 | <0.0001 | <0.0001 | <0.0001    | 0.0007  | <0.0001      | X       |       |
| ok179        | <0.0001 | <0.0001 | <0.0001 | <0.0001    | 0.0003  | 0.0012       | <0.0001 | X     |
| MLP          | N2      | ubc-9   | smo-1   | ubc-9;iow1 | iow1    | ubc-9;spo-11 | spo-11  | ok179 |
| N2           | X       |         |         |            |         |              |         |       |
| ubc-9        | 0.3279  | X       |         |            |         |              |         |       |
| smo-1        | 0.2694  | 0.0001  | X       |            |         |              |         |       |
| ubc-9;iow1   | <0.0001 | <0.0001 | <0.0001 | X          |         |              |         |       |
| iow1         | <0.0001 | <0.0001 | <0.0001 | <0.0001    | X       |              |         |       |
| ubc-9;spo-11 | <0.0001 | <0.0001 | <0.0001 | <0.0001    | 0.338   | X            |         |       |
| spo-11       | <0.0001 | <0.0001 | <0.0001 | <0.0001    | <0.0001 | <0.0001      | X       |       |
| ok179        | <0.0001 | <0.0001 | <0.0001 | <0.0001    | 0.0241  | 0.004        | <0.0001 | X     |

**Table S4: Pairwise significance for PMT, TZ, EP, and MLP RAD-51 focus counts (individual).** Mann-Whitney analysis was performed on raw data for each pairwise comparison. n-values were at least 200 nuclei per genotype. Significant p-values are in blue text and non-significant p-values are in red text.



|                           |         |              |              |                           |                     |                     |               |
|---------------------------|---------|--------------|--------------|---------------------------|---------------------|---------------------|---------------|
| singlet                   | N2      | <i>ubc-9</i> | <i>smo-1</i> | <i>ubc-9;mre-11(iow1)</i> | <i>mre-11(iow1)</i> | <i>ubc-9;spo-11</i> | <i>spo-11</i> |
| N2                        | X       |              |              |                           |                     |                     |               |
| <i>ubc-9</i>              | <0.0001 | X            |              |                           |                     |                     |               |
| <i>smo-1</i>              | <0.0001 | <0.0001      | X            |                           |                     |                     |               |
| <i>ubc-9;mre-11(iow1)</i> | <0.0001 | <0.0001      | <0.0001      | X                         |                     |                     |               |
| <i>mre-11(iow1)</i>       | <0.0001 | <0.0001      | <0.0001      | <0.0001                   | X                   |                     |               |
| <i>ubc-9;spo-11</i>       | <0.0001 | <0.0001      | <0.0001      | 0.185                     | <0.0001             | X                   |               |
| <i>spo-11</i>             | <0.0001 | <0.0001      | <0.0001      | <0.0001                   | 0.2918              | <0.0001             | X             |
| doublet                   | N2      | <i>ubc-9</i> | <i>smo-1</i> | <i>ubc-9;mre-11(iow1)</i> | <i>mre-11(iow1)</i> | <i>ubc-9;spo-11</i> | <i>spo-11</i> |
| N2                        | X       |              |              |                           |                     |                     |               |
| <i>ubc-9</i>              | <0.0001 | X            |              |                           |                     |                     |               |
| <i>smo-1</i>              | <0.0001 | 0.0003       | X            |                           |                     |                     |               |
| <i>ubc-9;mre-11(iow1)</i> | <0.0001 | <0.0001      | 0.0306       | X                         |                     |                     |               |
| <i>mre-11(iow1)</i>       | <0.0001 | 0.0087       | 0.0243       | 0.008                     | X                   |                     |               |
| <i>ubc-9;spo-11</i>       | <0.0001 | <0.0001      | <0.0001      | <0.0001                   | 0.0091              | X                   |               |
| <i>spo-11</i>             | X       | X            | X            | X                         | X                   | X                   | X             |
| triplet                   | N2      | <i>ubc-9</i> | <i>smo-1</i> | <i>ubc-9;mre-11(iow1)</i> | <i>mre-11(iow1)</i> | <i>ubc-9;spo-11</i> | <i>spo-11</i> |
| N2                        | X       |              |              |                           |                     |                     |               |
| <i>ubc-9</i>              | <0.0001 | X            |              |                           |                     |                     |               |
| <i>smo-1</i>              | <0.0001 | 0.2313       | X            |                           |                     |                     |               |

|                           |           |              |              |                           |                     |                     |               |
|---------------------------|-----------|--------------|--------------|---------------------------|---------------------|---------------------|---------------|
| <i>ubc-9;mre-11(iow1)</i> | <0.0001   | 0.3629       | 0.4088       | X                         |                     |                     |               |
| <i>mre-11(iow1)</i>       | <0.0001   | 0.386077     | 0.34426957   | 0.5790305                 | X                   |                     |               |
| <i>ubc-9;spo-11</i>       | <0.0001   | 0.0302       | 0.0037       | 0.0078                    | 0.3618              | X                   |               |
| <i>spo-11</i>             | X         | X            | X            | X                         | X                   | x                   | X             |
| quadruplet                | N2        | <i>ubc-9</i> | <i>smo-1</i> | <i>ubc-9;mre-11(iow1)</i> | <i>mre-11(iow1)</i> | <i>ubc-9;spo-11</i> | <i>spo-11</i> |
| N2                        | X         |              |              |                           |                     |                     |               |
| <i>ubc-9</i>              | 0.061156  | X            |              |                           |                     |                     |               |
| <i>smo-1</i>              | 0.128205  | 0.478107     | X            |                           |                     |                     |               |
| <i>ubc-9;mre-11(iow1)</i> | 0.15151   | 1            | 0.678571     | X                         |                     |                     |               |
| <i>mre-11(iow1)</i>       | 0.2222222 | 0.999999     | 0.999999     | 1                         | X                   |                     |               |
| <i>ubc-9;spo-11</i>       | 0.02424   | 0.493292     | 0.249999     | 1                         | 1                   | X                   |               |
| <i>spo-11</i>             | X         | X            | X            | X                         | X                   | X                   | X             |
| strings                   | N2        | <i>ubc-9</i> | <i>smo-1</i> | <i>ubc-9;mre-11(iow1)</i> | <i>mre-11(iow1)</i> | <i>ubc-9;spo-11</i> | <i>spo-11</i> |
| N2                        | X         |              |              |                           |                     |                     |               |
| <i>ubc-9</i>              | 0.24615   | X            |              |                           |                     |                     |               |
| <i>smo-1</i>              | 0.382352  | 0.2145856    | X            |                           |                     |                     |               |
| <i>ubc-9;mre-11(iow1)</i> | 1         | 0.834458     | 0.3763996    | X                         |                     |                     |               |
| <i>mre-11(iow1)</i>       | 0.666666  | 0.869988     | 0.637981     | 0.8951                    | X                   |                     |               |
| <i>ubc-9;spo-</i>         | 0.0047619 | 0.0184907    | 0.01165      | 0.01612358                | 0.0496685           | X                   |               |

|               |   |   |   |   |   |   |   |
|---------------|---|---|---|---|---|---|---|
| <i>11</i>     |   |   |   |   |   |   |   |
| <i>spo-11</i> | 1 | 1 | 1 | 1 | 1 | 1 | X |

**Table S5: Pairwise comparison of typical and atypical RAD-51 foci in different germline stages.** Pairwise comparison of genotypes for typical and atypical RAD-51 foci. Chi-squared analysis was used for singlets, doublets, and triplets. Fisher's exact test with the Freeman-Halton extension was used for *mre-11(iow1)* comparisons for triplets, as well as all quadruplet and string comparisons due to low sample size of these atypical RAD-51 structures.

| Germline stage | P-value |
|----------------|---------|
| PMT            | 0.52    |
| TZ             | 0.32    |
| EP             | 0.93    |
| LP             | 0.25    |

**Table S6: Statistical analysis of RAD-51 strings upon IR exposure.** There were no significant differences in number of strings observed in any stage of the germline (wild type or *ubc-9* mutant) upon exposure to IR.

| LARVAL                          | <i>+/nT1</i> | <i>ubc-9/nT1</i> | <i>mre-11(ok179)/nT1</i> | <i>ubc-9; mre-11(ok179)/nT1</i> | <i>rad-50/nT1</i> | <i>ubc-9;rad-50/nT1</i> |
|---------------------------------|--------------|------------------|--------------------------|---------------------------------|-------------------|-------------------------|
| <i>+/nT1</i>                    | X            |                  |                          |                                 |                   |                         |
| <i>ubc-9/nT1</i>                | 0.0012       | X                |                          |                                 |                   |                         |
| <i>mre-11(ok179)/nT1</i>        | 0.0006       | 0.9397           | X                        |                                 |                   |                         |
| <i>ubc-9; mre-11(ok179)/nT1</i> | >0.0001      | 0.2391           | 0.2764                   | X                               |                   |                         |
| <i>rad-50/nT1</i>               | 1            | 0.0272           | 0.021                    | 0.0024                          | X                 |                         |
| <i>ubc-9;rad-50/nT1</i>         | 0.13266      | 0.4201           | 0.3653                   | 0.0805                          | 0.254446          | X                       |
| ADULT                           | <i>+/nT1</i> | <i>ubc-9/nT1</i> | <i>mre-11(ok179)/nT1</i> | <i>ubc-9; mre-11(ok179)/nT1</i> | <i>rad-50/nT1</i> | <i>ubc-9;rad-50/nT1</i> |
| <i>+/nT1</i>                    | X            |                  |                          |                                 |                   |                         |
| <i>ubc-9/nT1</i>                | >0.0001      | X                |                          |                                 |                   |                         |
| <i>mre-11(ok179)/nT1</i>        | 0.0053       | 0.0131           | X                        |                                 |                   |                         |
| <i>ubc-9; mre-11(ok179)/nT1</i> | >0.0001      | 0.02             | >0.0001                  | X                               |                   |                         |
| <i>rad-50/nT1</i>               | 0.791147     | 0.0004           | 0.1119                   | >0.0001                         | X                 |                         |
| <i>ubc-9;rad-50/nT1</i>         | 0.012927     | 0.2707           | 0.5156                   | 0.0045                          | 0.064139          | X                       |

**Table S7: Pairwise comparison of GFP negative offspring from balanced hermaphrodites.** Fisher's exact test was performed on each pair of genotypes. Significant p-values < 0.05 are in blue text, non-significant values are in red text.

|                           | N2      | <i>ubc-9</i> | <i>smo-1</i> | <i>ubc-9; mre-11(iow1)</i> | <i>mre-11(iow1)</i> | <i>ubc-9;spo-11</i> | <i>spo-11</i> | <i>mre-11(ok179)</i> |
|---------------------------|---------|--------------|--------------|----------------------------|---------------------|---------------------|---------------|----------------------|
| N2                        | X       |              |              |                            |                     |                     |               |                      |
| <i>ubc-9</i>              | 0.0174  | X            |              |                            |                     |                     |               |                      |
| <i>smo-1</i>              | 0.1744  | 0.4269       | X            |                            |                     |                     |               |                      |
| <i>ubc-9;mre-11(iow1)</i> | >0.0001 | 0.0121       | 0.0009       | X                          |                     |                     |               |                      |
| <i>mre-11(iow1)</i>       | 0.0017  | >0.0001      | 0.0001       | >0.0001                    | X                   |                     |               |                      |
| <i>ubc-9;spo-11</i>       | 0.7486  | 0.0941       | 0.4171       | > 0.0001                   | 0.0061              | X                   |               |                      |
| <i>spo-11</i>             | 0.4485  | 0.0033       | 0.05         | >0.0001                    | 0.0199              | 0.3574              | X             |                      |
| <i>mre-11(ok179)</i>      | >0.0001 | 0.0032       | 0.0001       | 1                          | >0.0001             | >0.0001             | >0.0001       | X                    |

**Table S8:** Pairwise comparison of S-phase PMT nuclei. Cells positive for PCN-1 were counted; significance was determined through Fisher's exact test. Significant p-values < 0.05 are in blue text, non-significant values are in red text.

|                           | N2      | <i>ubc-9</i> | <i>smo-1</i> | <i>ubc-9; mre-11(iow1)</i> | <i>mre-11(iow1)</i> | <i>ubc-9;spo-11</i> | <i>spo-11</i> | <i>mre-11(ok179)</i> |
|---------------------------|---------|--------------|--------------|----------------------------|---------------------|---------------------|---------------|----------------------|
| N2                        | X       |              |              |                            |                     |                     |               |                      |
| <i>ubc-9</i>              | 0.0003  | X            |              |                            |                     |                     |               |                      |
| <i>smo-1</i>              | >0.0001 | 0.0001       | X            |                            |                     |                     |               |                      |
| <i>ubc-9;mre-11(iow1)</i> | >0.0001 | 0.3779       | 0.0033       | X                          |                     |                     |               |                      |
| <i>mre-11(iow1)</i>       | 0.3893  | 0.0534       | >0.0001      | 0.0011                     | X                   |                     |               |                      |
| <i>ubc-9;spo-11</i>       | >0.0001 | 0.4188       | 0.0128       | 0.0002                     | 1                   | X                   |               |                      |
| <i>spo-11</i>             | 0.0409  | 0.0388       | >0.0001      | 0.001                      | 0.3777              | 0.0053              | X             |                      |
| <i>mre-11(ok179)</i>      | 0.0096  | 0.2433       | >0.0001      | 0.0252                     | 0.0798              | 0.0638              | 0.3015        | X                    |

**Table S9: Pairwise comparison of M-phase PMT nuclei.** Cells positive for PH3 were counted; significance was determined through Fisher's exact test. Significant p-values < 0.05 are in blue text, non-significant values are in red text.

|          | <i>ubc-9(tm2610)</i> | N2   | p-Value |
|----------|----------------------|------|---------|
| Average: | 5.77                 | 5.82 | 0.84    |

**Table S10: GFP::*COSA-1* statistics in wild type and *ubc-9* mutants.** GFP::*COSA-1* foci were counted. Averages are displayed and Mann-Whitney p-value is not significant.

| Chromosome             | non-recombinant chromosomes | recombinant chromosomes | Double recombinant chromosomes | map distance (cM) | Chi-square p-value: |
|------------------------|-----------------------------|-------------------------|--------------------------------|-------------------|---------------------|
| II                     |                             |                         |                                |                   |                     |
| Wild Type              | 36                          | 42                      | 1                              | 33.4              | 0.001               |
| <i>abc-9(tm2610)/+</i> | 31                          | 29                      | 13                             | 50.3              |                     |
| I                      |                             |                         |                                |                   |                     |
| Wild Type              | 54                          | 21                      | 4                              | 20.44             | 0.0139              |
| <i>abc-9(tm2610)/+</i> | 43                          | 43                      | 7                              | 37.78             |                     |

**Table S11: Chi-squared analysis of recombination frequencies from wild type and *abc-9* heterozygotes.**

Recombination frequencies were used to determine map distance (equation can be found in materials and methods). Chi-squared analysis was used to determine significance.



| # nuclei in gonad          | N2      | <i>ubc-9</i> | <i>smo-1</i> | <i>ubc-9;</i><br><i>mre-11(iow1)</i> | <i>mre-11(iow1)</i> | <i>ubc-9;spo-11</i> | <i>spo-11</i> |
|----------------------------|---------|--------------|--------------|--------------------------------------|---------------------|---------------------|---------------|
| N2                         | X       |              |              |                                      |                     |                     |               |
| <i>ubc-9</i>               | >0.0001 | X            |              |                                      |                     |                     |               |
| <i>smo-1</i>               | 0.0527  | >0.0001      | X            |                                      |                     |                     |               |
| <i>ubc-9; mre-11(iow1)</i> | >0.0001 | 0.384        | >0.0001      | X                                    |                     |                     |               |
| <i>mre-11(iow1)</i>        | 1       | >0.0001      | 0.0483       | >0.0001                              | X                   |                     |               |
| <i>ubc-9;spo-11</i>        | >0.0001 | 0.5701       | >0.0001      | 0.093                                | >0.0001             | X                   |               |
| <i>spo-11</i>              | 1       | >0.0001      | 0.073        | >0.0001                              | 1                   | >0.0001             | X             |

**Table S12: Pairwise comparison of diakinesis EMO nuclei.** EMO nuclei and total nuclei were counted in all genotypes listed. Significance was determined through Fisher's exact test. Significant p-values < 0.05 are in blue text, non-significant values are in red text.

|       |         |         |       |
|-------|---------|---------|-------|
| 0hr   | N2      | ok      | ubc-9 |
| N2    | X       |         |       |
| ok    | 0.0653  | X       |       |
| ubc-9 | <0.0001 | <0.0001 | X     |
| 2hr   | N2      | ok      | ubc-9 |
| N2    | X       |         |       |
| ok    | <0.0001 | X       |       |
| ubc-9 | 0.4328  | 0.0024  | X     |
| 4hr   | N2      | ok      | ubc-9 |
| N2    | X       |         |       |
| ok    | 0.7526  | X       |       |
| ubc-9 | 0.0011  | <0.0001 | X     |
| 6hr   | N2      | ok      | ubc-9 |
| N2    | X       |         |       |
| ok    | 0.1775  | X       |       |
| ubc-9 | <0.0001 | <0.0001 | X     |
| 8hr   | N2      | ok      | ubc-9 |
| N2    | X       |         |       |
| ok    | <0.0001 | X       |       |
| ubc-9 | <0.0001 | <0.0001 | X     |

**Table S13: CPT pair-wise comparisons between genotypes at each time point.** N2 is wild type, ok is *mre-11(ok179)*, and ubc-9 is the *ubc-9(tm2610)* strain. All comparisons were performed using the Mann-Whitney test.

| N2    | 0       | 2       | 4       | 6       | 8 |
|-------|---------|---------|---------|---------|---|
| 0     | x       |         |         |         |   |
| 2     | <0.0001 | x       |         |         |   |
| 4     | <0.0001 | 0.0702  | x       |         |   |
| 6     | <0.0001 | <0.0001 | <0.0001 | x       |   |
| 8     | <0.0001 | <0.0001 | <0.0001 | <0.0001 | x |
| ok179 | 0       | 2       | 4       | 6       | 8 |
| 0     | x       |         |         |         |   |
| 2     | <0.0001 | x       |         |         |   |
| 4     | <0.0001 | <0.0001 | x       |         |   |
| 6     | <0.0001 | <0.0001 | <0.0001 | x       |   |
| 8     | <0.0001 | <0.0001 | <0.0001 | <0.0001 | x |
| ubc-9 | 0       | 2       | 4       | 6       | 8 |
| 0     | x       |         |         |         |   |
| 2     | <0.0001 | x       |         |         |   |
| 4     | <0.0001 | <0.0001 | x       |         |   |
| 6     | <0.0001 | <0.0001 | 0.4397  | x       |   |
| 8     | <0.0001 | <0.0001 | 0.0003  | 0.0026  | x |

**Table S14: CPT pair-wise comparisons within a genotype at each time point.** N2 is wild type, ok is *mre-11(ok179)*, and ubc-9 is the *ubc-9(tm2610)* strain. All comparisons were performed using the Mann-Whitney test.

|       |         |         |       |
|-------|---------|---------|-------|
| 0hr   | N2      | ok      | ubc-9 |
| N2    | X       |         |       |
| ok    | <0.0001 | X       |       |
| ubc-9 | <0.0001 | 0.4438  | X     |
| 2hr   | N2      | ok      | ubc-9 |
| N2    | X       |         |       |
| ok    | <0.0001 | X       |       |
| ubc-9 | <0.0001 | <0.0001 | X     |
| 4hr   | N2      | ok      | ubc-9 |
| N2    | X       |         |       |
| ok    | <0.0001 | X       |       |
| ubc-9 | <0.0001 | <0.0001 | X     |
| 6hr   | N2      | ok      | ubc-9 |
| N2    | X       |         |       |
| ok    | <0.0001 | X       |       |
| ubc-9 | <0.0001 | 0.02    | X     |
| 8hr   | N2      | ok      | ubc-9 |
| N2    | X       |         |       |
| ok    | <0.0001 | X       |       |
| ubc-9 | <0.0001 | 0.0275  | X     |

**Table S15: HU pair-wise comparisons between genotypes at each time point.** N2 is wild type, ok is *mre-11(ok179)*, and ubc-9 is the *ubc-9(tm2610)* strain. All comparisons were performed using the Mann-Whitney test.

| N2    | 0       | 2       | 4       | 6       | 8 |
|-------|---------|---------|---------|---------|---|
| 0     | X       |         |         |         |   |
| 2     | <0.0001 | X       |         |         |   |
| 4     | <0.0001 | <0.0001 | X       |         |   |
| 6     | <0.0001 | 0.6458  | <0.0001 | X       |   |
| 8     | <0.0001 | <0.0001 | <0.0001 | <0.0001 | X |
| ok    | 0       | 2       | 4       | 6       | 8 |
| 0     | X       |         |         |         |   |
| 2     | 0.0022  | X       |         |         |   |
| 4     | 0.485   | <0.0001 | X       |         |   |
| 6     | 0.0034  | <0.0001 | 0.0188  | X       |   |
| 8     | <0.0001 | <0.0001 | <0.0001 | 0.0002  | X |
| ubc-9 | 0       | 2       | 4       | 6       | 8 |
| 0     | X       |         |         |         |   |
| 2     | <0.0001 | X       |         |         |   |
| 4     | <0.0001 | <0.0001 | X       |         |   |
| 6     | <0.0001 | 0.0112  | <0.0001 | X       |   |
| 8     | <0.0001 | 0.0002  | 0.2321  | <0.0001 | X |

**Table S16: HU pair-wise comparisons within a genotype at each time point.** N2 is wild type, ok is *mre-11(ok179)*, and ubc-9 is the *ubc-9(tm2610)* strain. All comparisons were performed using the Mann-Whitney test.
